# Supplementary material
Source: HighWire-hosted journal article supplement (https://www.cmajopen.ca/highwire/filestream/88050/field_highwire_adjunct_files/2/open-2021-0179-original-submission.pdf)
Supplement: open-2021-0179-original-submission.pdf [file open-2021-0179-original-submission.pdf]

# Integrating community paramedicine with primary health care:

## A qualitative study of community paramedic views

### AUTHORS AND AFFILIATIONS

Gina Agarwal MBBS, PhD\*<sup>1,2</sup>; Amelia Keenan BSc<sup>1,2</sup>; Melissa Pirrie MA<sup>1</sup>; Francine Marzanek-Lefebvre BSc<sup>1</sup>

\*Corresponding author: gina.agarwal@gmail.com

<sup>1</sup>Department of Family Medicine, McMaster University, Hamilton, Ontario, Canada

<sup>2</sup>Department of Health Research Methods, Evidence, and Impact, McMaster University, Hamilton, Ontario, Canada

**WORD COUNT** 2432

### CONTRIBUTORS STATEMENT

Each named author (female-identifying) contributed substantially to this research. GA, MP and FM were involved in the data collection. All team members were involved in the analysis, drafting and revision of the manuscript.

### FUNDING STATEMENT

The authors received no specific funding for this work.

### CONFLICT OF INTEREST STATEMENT

All authors declare no conflict of interest.

### DATA SHARING

Data for this study are available in the form of a recorded webinar at this link:

(<http://mediasite.otn.ca/Mediasite/Play/61d50ab24af341188c2c1b4dc9d9d0dd1d?catalog=fd668812-d87c-47f9-b1ba-6d979fed9af4>)

**TITLE**

Integrating community paramedicine with primary health care: A qualitative study of community paramedic views

**WORD COUNT** 2432

**ABSTRACT**

**Background:** Community paramedicine (CP) is an emerging model of care that addresses local health needs through programs led by community paramedics; however, CP remains poorly defined and does not seem to be systematically integrated with the broader health system, specifically primary care within which it is seated. The purpose of this study was to elucidate the views of community paramedics and their stakeholders in Ontario, Canada, on the topic of integrating CP with the broader health system.

**Methods:** This was a retrospective qualitative study involving small and large group discussions which took place as part of a CP forum in 2017 in Ontario, Canada. All 89 forum attendees were invited through an email invitation. There were no exclusion criteria to attend the forum. Attendees were asked to discuss their views on how CP will fit into primary care and what medical oversight and acceptance for the profession will involve. The audio recording from the large group discussion was transcribed and thematically analyzed.

**Results:** Participants varied in gender (63% male) and professional affiliation (66% from a paramedic service). Among those affiliated with a paramedic service, 33% were community paramedics. Five major themes emerged: role of community paramedics, integration with other services, support for CP, standardization, and oversight.

1  
2  
3 **Interpretation:** Community paramedics and their stakeholders have insights into barriers and  
4  
5 facilitators for integration with the health system. These study findings could help inform the  
6  
7 integration of health and social services in Ontario that considers the unique position and  
8  
9 potential of community paramedics.  
10  
11

## 12 13 INTRODUCTION

### 14 15 *Community Paramedicine*

16  
17  
18 Community paramedicine (CP) is an emerging and evolving model of care within  
19  
20 primary care that expands upon the traditional role of paramedic services, often through locally  
21  
22 designed programs.<sup>1,2</sup> These programs have emerged in Canada and elsewhere and often involve  
23  
24 paramedics with additional training addressing complex low-acuity health needs within their  
25  
26 communities, especially those of seniors, patients with chronic health issues, and individuals  
27  
28 who frequently call 911.<sup>1-3</sup> For example, CP@clinic is an evidence-based weekly program that  
29  
30 takes place in social housing buildings where community paramedics conduct assessments (e.g.,  
31  
32 blood pressure, diabetes risk, fall risk), provide education, make referrals to community  
33  
34 resources, and communicate with family physicians regarding the health of their patients.<sup>4,5</sup> A  
35  
36 strength of CP is its ability to respond to a variety of health needs, tailored to local contexts.<sup>2,3,6</sup>  
37  
38 This, however, also presents a challenge for defining CP, standardizing training, and  
39  
40 understanding the role of the community paramedic.<sup>3</sup> So, despite some universal aims and its  
41  
42 potential to improve health and reduce emergency medical costs, CP remains inconsistently  
43  
44 defined.<sup>3,7</sup> In Ontario, semi-annual CP forums present opportunities for community paramedics  
45  
46 and stakeholders to discuss best practices and clarify roles of community paramedics, including  
47  
48 integration with other health services.<sup>8</sup>  
49  
50  
51  
52  
53

### 54 55 *Integration*

1  
2  
3 Integrated care is described by the World Health Organization as providing and managing  
4 multiple coordinated and patient-centred health services.<sup>9</sup> Interprofessional collaboration, an  
5 example of integration within primary care, involves effective communication, cooperation, and  
6 shared decision-making among health providers, each with clear and defined roles.<sup>10,11</sup>  
7  
8 Collaboration and coordination between the silos of primary care and others (e.g. community  
9 care, acute care) are needed to manage complex health and social conditions, particularly for  
10 seniors who live longer in communities with multiple chronic conditions.<sup>10-14</sup> Among CP  
11 programs that describe working with other health providers, physicians and primary care  
12 providers are the most common partners for collaboration.<sup>7,15</sup> In one example, community  
13 paramedics refer back to family physicians and others who care for complex patients.<sup>16</sup> Although  
14 interprofessional collaboration occurs within some CP programs in the literature, CP integration  
15 into the health system has yet to be achieved, perhaps in part due to inconsistent and poorly  
16 defined roles of community paramedics (e.g. training and scope of practice).<sup>3,7</sup>  
17  
18  
19  
20  
21  
22  
23  
24  
25  
26  
27  
28  
29  
30  
31  
32  
33

34 The purpose of this study is to better understand views of community paramedics,  
35 paramedic chiefs/supervisors and other CP stakeholders in Ontario regarding CP integration with  
36 the broader health system, specifically primary care in which it is seated.  
37  
38  
39  
40

## 41 **METHODS (443)**

### 42 *Design and Setting*

43  
44  
45  
46  
47 A retrospective qualitative study was conducted to understand the views of community  
48 paramedics and stakeholders involved in CP regarding integration with primary care and medical  
49 oversight in Ontario, Canada. Views were elicited using small focus groups occurring within a  
50 two-day CP forum in Ontario in 2017. A large group discussion, composed of all smaller focus  
51  
52  
53  
54  
55  
56  
57  
58  
59  
60

1  
2  
3 groups combined, was recorded in the form of a webinar and is publicly archived online by the  
4  
5 Ontario Telemedicine Network (1 hour and 15 minutes were allocated for all sessions  
6  
7 combined). This forum was co-hosted and organized by the McMaster Community Paramedicine  
8  
9 Research Team and the Hamilton Paramedic Service on behalf of the then Ontario CP  
10  
11 leadership.  
12  
13

### 14 15 *Sample and Recruitment*

16  
17  
18 Participants included all 89 forum attendees, most from a paramedic service in Ontario.  
19  
20 Attendees were invited by email invitation using attendee lists from a previous CP forum and  
21  
22 paramedic service partners, such as representatives from the Local Health Integration Networks  
23  
24 (LHINs, local health system management) and Health Links (care coordination systems). There  
25  
26 were no exclusion criteria for forum attendance.  
27  
28  
29  
30

### 31 *Data Collection*

32  
33  
34 Participants were asked to consider one of two sets of questions by GA, Principal  
35  
36 Investigator of the McMaster Community Paramedicine Research Team and practicing family  
37  
38 physician. Attendees self-selected these topics and could consider:  
39  
40

41  
42 A. Integration: *How will community paramedicine fit into primary care ultimately? What is*  
43  
44 *required to get us there?*  
45

46  
47 Or

48  
49  
50 B. Medical oversight: *What will be required for medical oversight and acceptance? How*  
51  
52 *will we get there?*  
53  
54  
55  
56  
57  
58  
59  
60

1  
2  
3 The research team divided each topic into two groups for a total of four small focus  
4 groups, each with a volunteer note-taker. In these small focus groups, facilitators (composed of  
5 the forum co-hosts) provided the opportunity to all participants to share their views. Then,  
6 attendees re-assembled and group note-takers described what was discussed in their respective  
7 groups, providing an opportunity for group members to validate that their ideas were accurately  
8 represented. This large group discussion was the content for our thematic analysis. Field notes  
9 were taken by two research team members independently during the whole process for  
10 triangulation of findings.  
11  
12  
13  
14  
15  
16  
17  
18  
19  
20

### 21 *Data Analysis*

22  
23  
24  
25 Following transcription of the audio recording from the large group discussion, the  
26 transcript was thematically analyzed using a word processor through iterative coding and  
27 validation, with reference to field notes. Three team members were involved in individually  
28 coding the transcript. Themes and sub-themes were deliberated in full-team discussions and  
29 consensus was reached at all levels of abstraction. A comprehensive codebook was created that  
30 reflected this process and organized all direct quotes into themes and sub-themes.  
31  
32  
33  
34  
35  
36  
37  
38  
39

### 40 *Ethics Approval*

41  
42  
43 This study was approved by the Hamilton Integrated Research Ethics Board #13154.  
44  
45

## 46 **RESULTS**

47  
48 Attendees varied in their observed gender, professional affiliation, and roles within  
49 paramedic services; demographic results are shown in Table 1. Most forum attendees were from  
50 a paramedic service (66%) and among this group, the most common role was community  
51 paramedic (24%).  
52  
53  
54  
55  
56  
57  
58  
59  
60

1  
2  
3  
4  
5  
6  
7  
8  
9  
10  
11  
12  
13  
14  
15  
16  
17  
18  
19  
20  
21  
22  
23  
24  
25  
26  
27  
28  
29  
30  
31  
32  
33  
34  
35  
36  
37  
38  
39  
40  
41  
42  
43  
44  
45  
46  
47  
48  
49  
50  
51  
52  
53  
54  
55  
56  
57  
58  
59  
60

| <b>Table 1: Summary of attendee characteristics</b>        |                         |
|------------------------------------------------------------|-------------------------|
| <b>Characteristic</b>                                      | <b>No. of attendees</b> |
| Gender                                                     | <i>n</i> = 89           |
| Male                                                       | 56                      |
| Female                                                     | 33                      |
| Professional affiliation                                   | <i>n</i> = 89           |
| Paramedic service                                          | 59                      |
| Organization                                               | 13                      |
| MOHLTC*                                                    | 9                       |
| Research institution                                       | 4                       |
| Hospital                                                   | 2                       |
| Municipality                                               | 1                       |
| Not disclosed                                              | 1                       |
| Role within paramedic service                              | <i>n</i> = 59**         |
| Community paramedic                                        | 14                      |
| Deputy/assistant chief                                     | 9                       |
| Superintendent/supervisor                                  | 8                       |
| Commander                                                  | 6                       |
| Coordinator                                                | 6                       |
| Manager                                                    | 6                       |
| Chief                                                      | 4                       |
| Other paramedic                                            | 3                       |
| Lead paramedic                                             | 2                       |
| Social navigator                                           | 1                       |
| *Note: MOHLTC = Ministry of Health and Long Term Care      |                         |
| **Only among attendees affiliated with a paramedic service |                         |

Five major themes emerged from the large group discussion and include the role of community paramedics, integration with other services, support for CP, standardization, and oversight. These themes and their subthemes are shown in Table 2 and contextualized with illustrative quotes.

| <b>Table 2: Illustrative quotes</b>               |                                                                                                                                                                                                                                                                                                                                                                                       |
|---------------------------------------------------|---------------------------------------------------------------------------------------------------------------------------------------------------------------------------------------------------------------------------------------------------------------------------------------------------------------------------------------------------------------------------------------|
| Themes & Subthemes                                | Illustrative quotes                                                                                                                                                                                                                                                                                                                                                                   |
| <b>1. Role of community paramedics</b>            |                                                                                                                                                                                                                                                                                                                                                                                       |
| (A) Visit/call                                    | "[We make] sure that people who want to stay home can stay at home; people in their homes, the whole 911 trip to the ER. These are things that we currently do now." (Group 1)                                                                                                                                                                                                        |
| (B) Complex needs & diversity of clients          | "We often say that 'CP fills the gap' but, as a matter of fact, you don't fill a gap as much as you address a challenging situation that doesn't fit in sort of one particular pot ." (Group 2)                                                                                                                                                                                       |
| (C) Identify social concerns                      | "[during the] medical assessment that [we do], [an important part] is uncovering these social situations that are leading to the medical concerns" (Group 2)                                                                                                                                                                                                                          |
| (D) Adapt                                         | "we're all paramedics that are doing the CP work and pretty much we're all very adaptable people. It's something that we kind of pride ourselves in — our ability to walk into various locations, various places, and come out having made friends, come out having gained the confidence of the people we need to gain the confidence of. I call it the chameleon effect." (Group 1) |
| (E) Patient Advocacy                              | "getting things advocated for your patients... making sure that the patient gets what they need in the way of treatments and in the way of attention." (Group 1)                                                                                                                                                                                                                      |
| (F) Target long-term disease                      | "Ultimately, we should all strive to get involved in [clinics]. It's probably a really good thing; it will minimize calls if you can nip that sort of long term disease process in the bud — or at least control it. Then, it's not going to become as much of an issue down the road." (Group 1)                                                                                     |
| <b>2. Integration with other services</b>         |                                                                                                                                                                                                                                                                                                                                                                                       |
| (A) Fit with primary care and social service      | "The fit is really with primary care and the social service system. So I think we can agree that in Ontario, although it's all maybe under a giant umbrella of primary care, the two systems sometimes don't work so well together." (Group 2)                                                                                                                                        |
| (B) In patient care pathway                       | Basically, communications with the physicians...and making sure that the physician is on board with you — number one, interjecting yourself into his client or patient's relationship with him...(Group 1)                                                                                                                                                                            |
| (C) Make contact and operationalize relationships | "the biggest problem is finding some sort of system to make contact with the family doctors, and in particular the solo physicians"(Group 1)                                                                                                                                                                                                                                          |
| <b>3. Support for CP</b>                          |                                                                                                                                                                                                                                                                                                                                                                                       |
| (A) Support and acceptance from family physicians | "one of the things of course that we need to do is obtain buy-in " (Group 3)                                                                                                                                                                                                                                                                                                          |
| (B) Communicate benefits of CP                    | "Somebody mentioned getting into the medical schools so that medical students are learning from the get-go that paramedics are out here, we have a very high skill-set, and we are more than willing to work with them to help and benefit their clients." (Group 4)                                                                                                                  |
| (C) Central promotion                             | "centralized awareness— coming up with a system where we can make community paramedicine more known with the primary care group." (Group 2)                                                                                                                                                                                                                                           |
| <b>4. Standardization</b>                         |                                                                                                                                                                                                                                                                                                                                                                                       |
| (A) Guidelines and directives                     | "[It would be good to have] clinical practice guidelines that we could share with [physicians] and they can approve or at least know what we're doing." (Group 3)                                                                                                                                                                                                                     |
| (B) Skills and equipment                          | "As for the actual oversight, it [is] an issue of standardization of practice. There are something like 8 or 10 [individual paramedic services] in [one] base hospital control [but they] all have somewhat different... equipment ; they might have slightly different skill sets." (Group 4)                                                                                        |

|                                         |                                                                                                                                                                                                                                                                                                                                                                                                                                                                                                                                                                                    |
|-----------------------------------------|------------------------------------------------------------------------------------------------------------------------------------------------------------------------------------------------------------------------------------------------------------------------------------------------------------------------------------------------------------------------------------------------------------------------------------------------------------------------------------------------------------------------------------------------------------------------------------|
| (C) Documentation and reporting         | "I know what the documentation is here in <name of region>. I don't know how it's different in other services. We need to be talking about the documentation so that everybody is doing the same reports." (Group 4)                                                                                                                                                                                                                                                                                                                                                               |
| (D) Build reputation                    | "We need to establish standardization and have some continuity and... best-practice — some clinical best practices — so that the physicians know that it is not a fly-by-night practice that we're doing." (Group 3)                                                                                                                                                                                                                                                                                                                                                               |
| (E) Need to account for context         | "It struck me that in our group there were several types of community paramedicine programs — all different ways of receiving referrals, all different ways of sort of managing the patient load. And so that right there is great and I think that is what has to happen in Ontario because of the diversity in geography and practice patterns in primary care." (Group 2)                                                                                                                                                                                                       |
| (F) Pilot projects within jurisdictions | "If you wanted to work with the LHINs [Local Health Integration Networks] and they're trying to say well you have to do something that is established across the whole LHIN boundaries, and we have services that have more than one LHIN, and certainly have multiple Health Links, then maybe you could do demonstration projects, or pilot projects, within certain areas within that LHIN that could address a certain geographical need within that area." (Group 3)                                                                                                          |
| <b>5. Oversight</b>                     |                                                                                                                                                                                                                                                                                                                                                                                                                                                                                                                                                                                    |
| (A) External medical directives         | "When we're on the road we're not truly working as [paramedics], we're working as community paramedics. So, utilizing our skills is sort of outside the realm of what we should be doing [as paramedics]. So utilizing a medical control ... would allow for ... different skill levels. What that would allow for is us to do basic checking ... for antibiotics, blood, urine dip, that sort of thing; taking blood, sending someone to an urgent care centre [instead of] an ER, to keep the ERs clear. And those are just a few of the things that we came up with." (Group 1) |
| (B) Need to centralize oversight        | "If base hospitals could take on a family physician, not as a full-time, but as somebody that we could turn to so we're still only responsible to the base hospital... [perhaps a] family physician ... could be taken in on contract with the base hospital. Then, it would all still be one oversight." (Group 4)                                                                                                                                                                                                                                                                |
| (C) Self-regulation                     | "Places that do have successful community paramedicine programs do have self-regulation — you look at Great Britain, where actually the paramedics are consulting with physicians rather than getting delegation from physicians...paramedics are considered as health care providers, not ambulance drivers..." (Group 3)                                                                                                                                                                                                                                                         |

### *Role of Community Paramedics*

Attendees provided their perspectives on the community paramedic role by describing core components and model initiatives in Ontario. One group outlined home visits and phone calls as core role components that may reduce unnecessary emergency trips to the hospital, benefitting clients who wish to stay home and alleviating pressure on the strained emergency system (1A). One group highlighted the need for community paramedics to have a complex understanding of client needs (1B). These complex issues addressed by community paramedics are not exclusively health in nature but also encompass social concerns that ultimately impact health (1C). As exemplified by one group, community paramedics have identified poor diet and caregiver burnout in clients' homes which may have been concealed from family physicians.

1  
2  
3 One group attributed adaptability among community paramedics to their success in this work and  
4 also highlighted the role of advocacy that community paramedics must take on to support  
5 patients (1D-E). Beyond home visits and phone calls, attendees highlighted other defined  
6 programs (such as CP@clinic) delivered by community paramedics that target chronic diseases  
7 and should be expanded (1F). To effectively fulfill their role, community paramedics may  
8 consider integrating with other primary care and community services, as discussed in the next  
9 theme.

### 10 11 12 13 14 15 16 17 18 19 20 *Integration*

21  
22  
23 Attendees described CP as fitting with both primary care and social services (2A) — a  
24 reflection of how community paramedics may currently work, referring clients to community  
25 services and coordinating with family physicians. Systematic integration was envisioned by one  
26 group as community paramedics becoming part of the primary care pathway where they  
27 communicate directly with patient care teams (e.g. as case managers) and are involved in patient-  
28 physician communication (2B). While this collaboration with family physicians was described  
29 by one group as currently taking place in some settings, finding a way to make contact with  
30 physicians and operationalizing these relationships was described by multiple groups as the  
31 biggest challenge to achieving integration (2C). Multiple groups provided suggestions for  
32 moving forward including developing strategies for communicating with clinical care models,  
33 building relationships with medical schools, and making early contact with family physicians  
34 and health teams at an individual level. Notably, solo physicians were perceived by multiple  
35 groups as being more difficult to make contact with and more hesitant to collaborate with  
36 community paramedics compared to physicians who work within family health teams. Support  
37  
38  
39  
40  
41  
42  
43  
44  
45  
46  
47  
48  
49  
50  
51  
52  
53  
54  
55  
56  
57  
58  
59  
60

1  
2  
3 from all types of physicians was described as required for integrating CP with the broader health  
4 system.  
5  
6

### 7 8 *Support for CP* 9

10  
11 Experiences with external support for CP were not uniform. One group provided the  
12 example of a family physician who advocates for CP both in the community and the health  
13 system, making them an effective CP supporter. Other groups expressed the continued need to  
14 obtain buy-in and acceptance from family physicians, especially those who may be more  
15 traditional, and with whom community paramedics aim to collaborate (3A). One strategy  
16 proposed by many groups is to communicate benefits of CP widely and in many forms (3B).  
17 This includes explaining billing processes to family physicians when community paramedics  
18 conduct assessments, reaching out to medical schools to advocate for the skills of community  
19 paramedics and their willingness to collaborate, and highlighting the value of having community  
20 paramedics for challenging situations that may not be well addressed in current practice.  
21 Ultimately, to garner support effectively, one group expressed that strategies need to be  
22 centralized and share core components (3C). Attendees supported additional aspects of  
23 standardization, as discussed next.  
24  
25  
26  
27  
28  
29  
30  
31  
32  
33  
34  
35  
36  
37  
38  
39  
40

### 41 42 *Standardization* 43

44  
45 Standardizing CP across Ontario was discussed by multiple groups and encompassed  
46 many dimensions. One group proposed developing clinical practice guidelines (4A) and another  
47 suggested uniformity in CP documentation and reporting, perhaps using databases for referrals  
48 and charting (4C). A perceived benefit of achieving standard practices with protocols, according  
49 to one group, is building CP credibility among physicians and avoiding a reputation of being  
50  
51  
52  
53  
54  
55  
56  
57  
58  
59  
60

1  
2  
3 unreliable (4D). Despite these calls for standardization, context-specific differences between CP  
4  
5 practices across the province were described as necessary by many groups, highlighting the  
6  
7 diversity of Ontario, especially between urban and rural settings (4E). For instance, community  
8  
9 contexts differ even within one jurisdictional area, as acknowledged by one group who suggested  
10  
11 implementing CP pilot projects that address particular community needs in lieu of single  
12  
13 programs across entire jurisdictions (4F). To promote standardization and develop the practice of  
14  
15 CP, attendees discuss how oversight and medical delegation may also need to change.  
16  
17  
18

### 19 20 *Oversight*

21  
22  
23 Attendees supported reconsidering medical oversight for community paramedics in their  
24  
25 emerging role which is expanded from that of the traditional paramedic and often includes  
26  
27 different clinical assessments and non-emergency focuses. This has prompted some paramedic  
28  
29 services to seek medical direction for community paramedics outside typical sources (5A), such  
30  
31 as through family physicians who are well suited to overseeing these types of primary care  
32  
33 responsibilities. How family physicians will be incorporated was a concern for one group who  
34  
35 proposed that family physicians integrate into current oversight structures (such as base hospitals  
36  
37 and LHINs) to centralize oversight so that community paramedics can receive delegation and  
38  
39 guidance from one place (5B). Another group proposed self-regulation of the CP profession in  
40  
41 lieu of medical oversight (5C). This group highlighted the success of paramedicine self-  
42  
43 regulation in the UK and supported an independent profession of paramedics as collaborators  
44  
45 instead of delegated health care providers.  
46  
47  
48  
49  
50

## 51 **INTERPRETATION**

### 52 53 54 55 *Summary*

1  
2  
3  
4  
5  
6  
7  
8  
9  
10  
11  
12  
13  
14  
15  
16  
17  
18  
19  
20  
21  
22  
23  
24  
25  
26  
27  
28  
29  
30  
31  
32  
33  
34  
35  
36  
37  
38  
39  
40  
41  
42  
43  
44  
45  
46  
47  
48  
49  
50  
51  
52  
53  
54  
55  
56  
57  
58  
59  
60

These findings highlight achievements and remaining challenges for integrating CP into the broader health system, and specifically primary care, from the perspective of community paramedics in Ontario and their stakeholders. Major considerations identified for further action in the province include standardizing practices and directives, strategizing how to make contact with family physicians and operationalize these relationships, gaining acceptance and support from other health providers, and centralizing oversight.

### *Explanation of Findings*

Standardizing CP practices while still tailoring programs to community needs was generally supported by participants in this study and is similarly described in the literature.<sup>3,17</sup> This balance may be fulfilled by employing evidence-based practices such as the CP@clinic health promotion and disease prevention program that uses defined protocols while allowing for context modifications and making use of local community referral pathways and resources, as described elsewhere.<sup>4</sup> The standard paramedic wellness program, CP@clinic, can be conducted in patient homes, social housing buildings, shelters, others community locations and utilizes generic as well as localized resources.<sup>4</sup> Centralizing oversight for CP, as recommended by participants in this study and given that family physicians do often provide medical direction to community paramedics in practice,<sup>18</sup> could contribute to standardizing practices.

In our study and the literature, community paramedics are seen positively as collaborators with primary care and social service providers<sup>2,3,7,15</sup> and as advocates for patient care.<sup>15</sup> Despite this, the role of CP continues to lack a consistent definition and scope which challenges its integration with and acceptance by other health care providers.<sup>3,6,17,19</sup> More organizational support (including professional development and training) to establish clear roles and responsibilities of community

1  
2  
3 paramedics working in primary care will prevent role duplication and promote acceptance from  
4  
5 other health providers and patients.<sup>3,6,7,15,17</sup>  
6  
7

8  
9 Finally, there are notions of self-regulation for the paramedic profession in Ontario in lieu  
10 of medical direction and complex oversight,<sup>20</sup> as is the case in the UK.<sup>19</sup> This is a challenge in  
11 Ontario where training and practices are inconsistent across regions.<sup>3</sup> Developing an independent  
12 paramedic professional identity would help with the pursuit of self-regulation.<sup>19</sup> Continuing to  
13 raise awareness about community paramedics and their potential as valuable members of primary  
14 health care may be achieved through research and evidence on safety, effectiveness, and benefits  
15 of CP, of which there are emerging examples.<sup>21</sup>  
16  
17  
18  
19  
20  
21  
22  
23  
24

#### 25 *Gaps + Future Directions*

26  
27  
28 As Ontario centralizes its health system and Ontario Health Teams emerge,<sup>22-24</sup> how and to  
29 what degree CP may integrate with these new structures remains unknown. Future research could  
30 explore the impacts of these upcoming changes on existing CP program operations and elucidate  
31 the views of others in primary health care (such as family physicians) about integrating CP with  
32 their work. Also, future work in this area is needed to achieve standardized CP practices that are  
33 evidence-based and that contribute to a strong CP professional identity — one that is integrated  
34 with and trusted by primary health care in Ontario and elsewhere.  
35  
36  
37  
38  
39  
40  
41  
42  
43

#### 44 *Limitations*

45  
46  
47 The participants of this study include only those who attended the CP Forum in 2017,  
48 which may not represent all perspectives in the Ontario CP landscape. Further, some participant  
49 views may be more prominent in these results due to the nature of focus groups and group  
50  
51  
52  
53  
54  
55  
56  
57  
58  
59  
60

1  
2  
3 discussions. Although these findings are not generalizable outside of Ontario, other jurisdictions  
4  
5 may face similar challenges and could benefit from these results.  
6  
7

### 8 9 *Conclusions*

10  
11 Community paramedics and their stakeholders in Ontario have insights into barriers and  
12  
13 facilitators for integrating CP with the broader health system, specifically primary care. Findings  
14  
15 from this study could help inform future direction for CP and achieve an integrated health system  
16  
17 in Ontario that considers the unique position and potential of community paramedics. Ultimately,  
18  
19 integration with primary care and social service systems is highly complex and requires many  
20  
21 stakeholders at the decision-making table. Future work should focus on how best to facilitate  
22  
23 integration in Ontario with a fragmented and changing system.  
24  
25  
26  
27

### 28 29 REFERENCES

- 30  
31 1. Canadian Standards Association (CSA). Community paramedicine: Framework for program  
32 development. Toronto (ON): 2017.  
33  
34 2. Kizer KW, Shore K, Moulin A. Community Paramedicine: A Promising Model for Integrating  
35 Emergency and Primary Care. 2013 [cited 2021 Jul 13]; Available from:  
36 <https://escholarship.org/uc/item/8jq9c187>  
37  
38 3. Chan J, Griffith LE, Costa AP, Leyenaar MS, Agarwal G. Community paramedicine: A  
39 systematic review of program descriptions and training. *Can J Emerg Med* undefined/ed;1–13.  
40  
41 4. Agarwal G, Angeles RN, McDonough B, McLeod B, Marzanek F, Pirrie M, et al.  
42 Development of a community health and wellness pilot in a subsidised seniors' apartment  
43 building in Hamilton, Ontario: Community Health Awareness Program delivered by Emergency  
44 Medical Services (CHAP-EMS). *BMC Res Notes* 2015;8(1):113.  
45  
46 5. Agarwal G, Angeles R, Pirrie M, McLeod B, Marzanek F, Parascandalo J, et al. Evaluation of  
47 a community paramedicine health promotion and lifestyle risk assessment program for older  
48 adults who live in social housing: a cluster randomized trial. *CMAJ* 2018;190(21):E638–47.  
49  
50 6. Eaton G, Wong G, Tierney S, Roberts N, Williams V, Mahtani KR. Understanding the role of  
51 the paramedic in primary care: a realist review. *BMC Medicine*. 2021 Jun 25;19(1):145.  
52  
53  
54  
55  
56  
57  
58  
59  
60

- 1  
2  
3 7. Thurman WA, Moczygemba LR, Tormey K, Hudzik A, Welton-Arndt L, Okoh C. A scoping  
4 review of community paramedicine: evidence and implications for interprofessional practice. *J*  
5 *Interprof Care* 2020;1–11.
- 6  
7 8. Initiatives [Internet]. Ont. Community Paramed. Secr. [cited 2021 Jul 13]; Available from:  
8 <https://www.ontariopcsecretariat.ca/initiatives>
- 9  
10 9. WHO. Integrated health services—what and why? Technical Brief No. 1. Geneva World Health  
11 Organ 2008
- 12  
13 10. Bookey-Bassett S, Markle-Reid M, Mckey CA, Akhtar-Danesh N. Understanding  
14 interprofessional collaboration in the context of chronic disease management for older adults  
15 living in communities: a concept analysis. *J Adv Nurs* 2017;73(1):71–84.
- 16  
17 11. Samuelson M, Tedeschi P, Aarendonk D, de la Cuesta C, Groenewegen P. Improving  
18 interprofessional collaboration in primary care: position paper of the European Forum for  
19 Primary Care. *Qual Prim Care* 2012;20(4):303–12.
- 20  
21 12. Aggarwal M, Williams AP. Tinkering at the margins: evaluating the pace and direction of  
22 primary care reform in Ontario, Canada. *BMC Fam Pract* 2019;20(1):128.
- 23  
24 13. Sinha SK. Living longer, living well. 2012 [cited 2021 Jul 13]. Available from:  
25 [https://www.health.gov.on.ca/en/common/ministry/publications/reports/seniors\\_strategy/](https://www.health.gov.on.ca/en/common/ministry/publications/reports/seniors_strategy/)
- 26  
27 14. Johri M, Beland F, Bergman H. International experiments in integrated care for the elderly: a  
28 synthesis of the evidence. *Int J Geriatr Psychiatry* 2003;18(3):222–35.
- 29  
30 15. Rasku T, Kaunonen M, Thyer E, Paavilainen E, Joronen K. The core components of  
31 Community Paramedicine – integrated care in primary care setting: a scoping review. *Scand J*  
32 *Caring Sci* 2019;33(3):508–21.
- 33  
34 16. Brydges M, Denton M, Agarwal G. The CHAP-EMS health promotion program: a  
35 qualitative study on participants’ views of the role of paramedics. *BMC Health Serv Res*  
36 2016;16(1):435.
- 37  
38 17. Bigham BL, Kennedy SM, Drennan I, Morrison LJ. Expanding Paramedic Scope of Practice  
39 in the Community: A Systematic Review of the Literature. *Prehosp Emerg Care* 2013;17(3):361–  
40 72.
- 41  
42 18. Leyenaar M, McLeod B, Chan J, Tavares W, Costa A, Agarwal G. A scoping study and  
43 qualitative assessment of care planning and case management in community paramedicine. *Ir J*  
44 *Paramed* 2018 [cited 2021 Jul 13];3(1). Available from:  
45 <http://www.irishparamedicine.com/index.php/ijp/article/view/76>
- 46  
47 19. O’Meara P, Wingrove G, McKeage M. Self-regulation and medical direction: Conflicted  
48 approaches to monitoring and improving the quality of clinical care in paramedic services. *Int J*  
49 *Health Gov* 2018;23(3):233–42.
- 50  
51 20. The Process [Internet]. Ont. Paramed. Assoc. [cited 2021 Jul 13]; Available from:  
52 <https://www.ontarioparamedic.ca/self-regulation/process/>
- 53  
54  
55  
56  
57  
58  
59  
60

- 1  
2  
3 21. Agarwal G, Angeles R, Pirrie M, McLeod B, Marzanek F, Parascandalo J, et al. Evaluation  
4 of a community paramedicine health promotion and lifestyle risk assessment program for older  
5 adults who live in social housing: a cluster randomized trial. CMAJ 2018;190(21):E638–47.  
6  
7 22. Pilon M, Brouard F. Description and Observations of the Transition from LHINs to Ontario  
8 Health Agency [Internet]. Rochester, NY: Social Science Research Network; 2020 [cited 2021  
9 Jul 13]. Available from: <https://papers.ssrn.com/abstract=3765528>  
10  
11 23. Improving health care in Ontario | Ontario.ca [Internet]. [cited 2021 Jul 13]; Available from:  
12 <https://www.ontario.ca/page/improving-health-care-ontario>  
13  
14 24. Government of Ontario. (2019b). The People’s Health Care Act, 2019, S.O. 2019, c. 5 - Bill  
15 74 (2019). Ontario. [cited 2021 Jul 13]; Available from  
16 <https://www.ontario.ca/laws/statute/S19005>  
17  
18  
19  
20  
21  
22  
23  
24  
25  
26  
27  
28  
29  
30  
31  
32  
33  
34  
35  
36  
37  
38  
39  
40  
41  
42  
43  
44  
45  
46  
47  
48  
49  
50  
51  
52  
53  
54  
55  
56  
57  
58  
59  
60

Confidential
